# Supplementary material for: Genome-wide association study of circulating levels of glucagon during an oral glucose tolerance test
Source: PubMed Central journal article supplement (PMC7788944; doi:10.1186/s12920-020-00841-7), 2021-01-06
Supplement: 12920_2020_841_MOESM2_ESM.pdf [file 12920_2020_841_MOESM2_ESM.pdf]

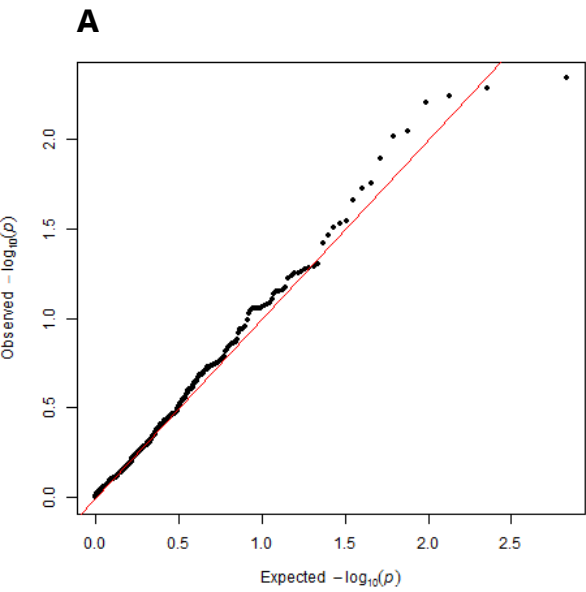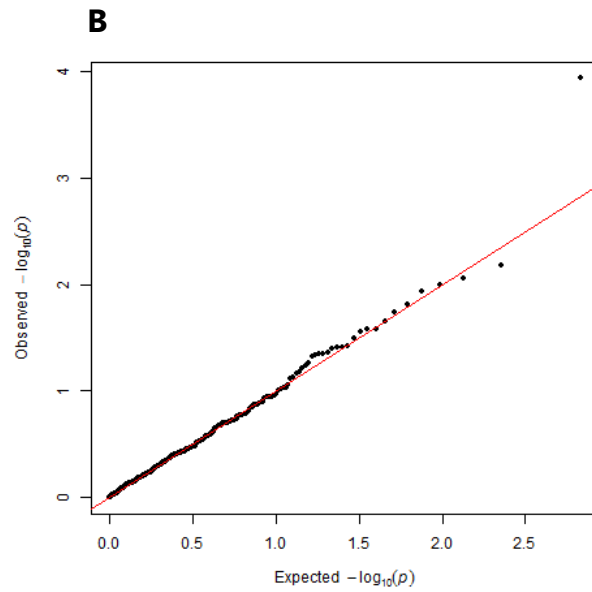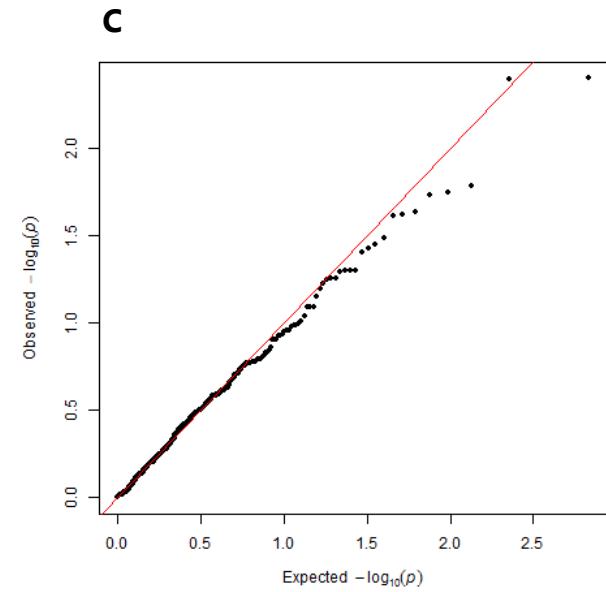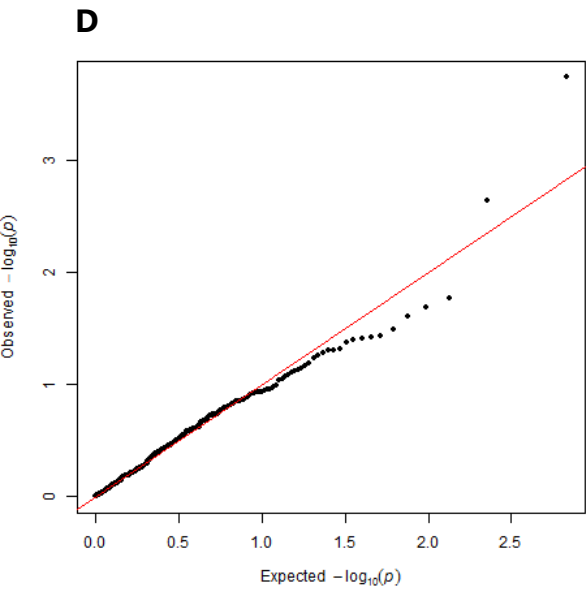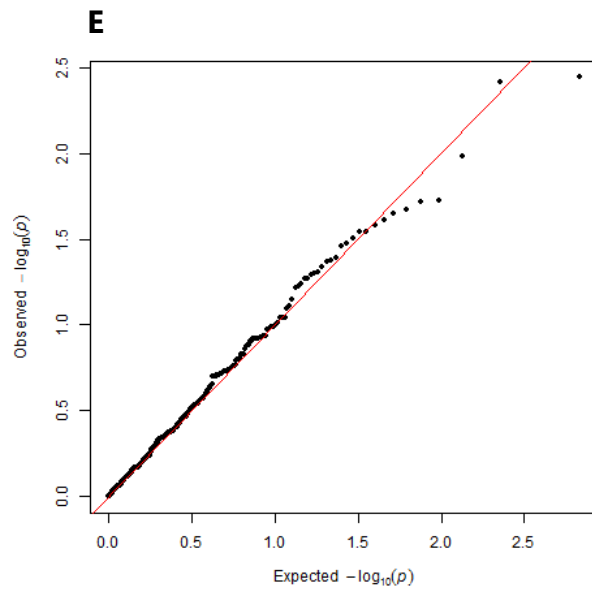

**Supplementary Figure 1. QQ-plot of selected variants previously reported to associate with increased risk of type 2 diabetes.** The figure shows the observed vs. the expected  $P$ -values of the selected variants for fasting glucagon (A), 30 min glucagon (B), 120 min glucagon (C), decremental area under the curve (dAUC) 0-30 minutes of glucagon (D) and dAUC 0-120 minutes of glucagon (E) during the OGTT. There was no obvious excess of genetic variants, previously associated with type 2 diabetes, associating with circulating glucagon during OGTT.
